# Supplementary material for: Myc and Miz-1 have coordinate genomic functions including targeting Hox genes in human embryonic stem cells
Source: Springer Nature journal article supplement (doi:10.1186/1756-8935-4-20), 2011-11-04
Supplement: 13072_2011_71_MOESM2_ESM.PDF [file 13072_2011_71_MOESM2_ESM.PDF]

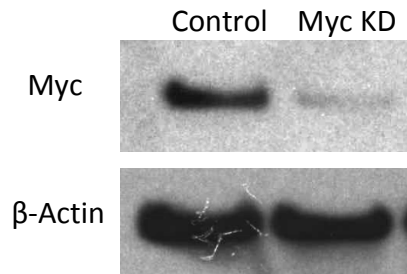

Figure S1. Confirmation of Myc knockdown in human ES cells by Western Blot analysis.
