# Supplementary material for: Myc and Miz-1 have coordinate genomic functions including targeting Hox genes in human embryonic stem cells
Source: Springer Nature journal article supplement (doi:10.1186/1756-8935-4-20), 2011-11-04
Supplement: Additional file 5 [file 1756-8935-4-20-s5.pdf]

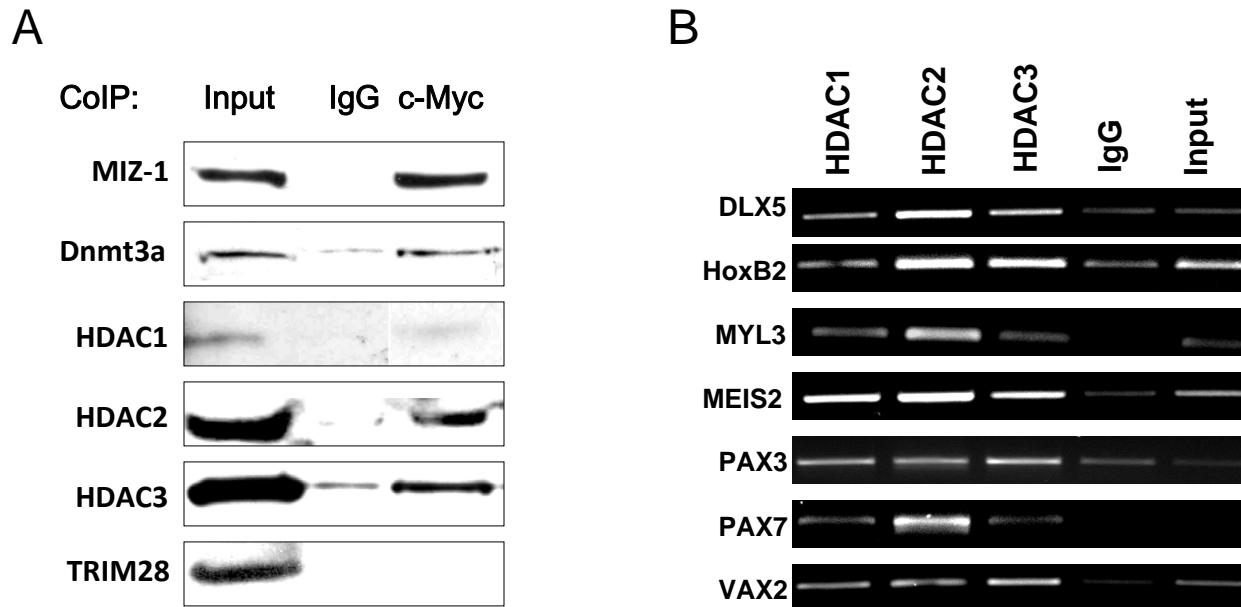

**Figure S4. Myc associates with Miz-1, HDACs, and DNMT3A in vivo in human ES cells.** A. Co-immunoprecipitation with a c-myc antibody or a non-specific IgG. Western blot analysis was performed using antibodies specific to Miz-1, Dnmt3a, HDAC1, HDAC2, HDAC3. TRIM28 was used as a negative control for the interaction with Myc. B. ChIP on Myc and Miz-1 co-bound gene targets.
