# Supplementary figures and images for: Myc and Miz-1 have coordinate genomic functions including targeting Hox genes in human embryonic stem cells
Source: Springer Nature journal article supplement (doi:10.1186/1756-8935-4-20), 2011-11-04

A

### Miz-1 Bound Genes by Ontology

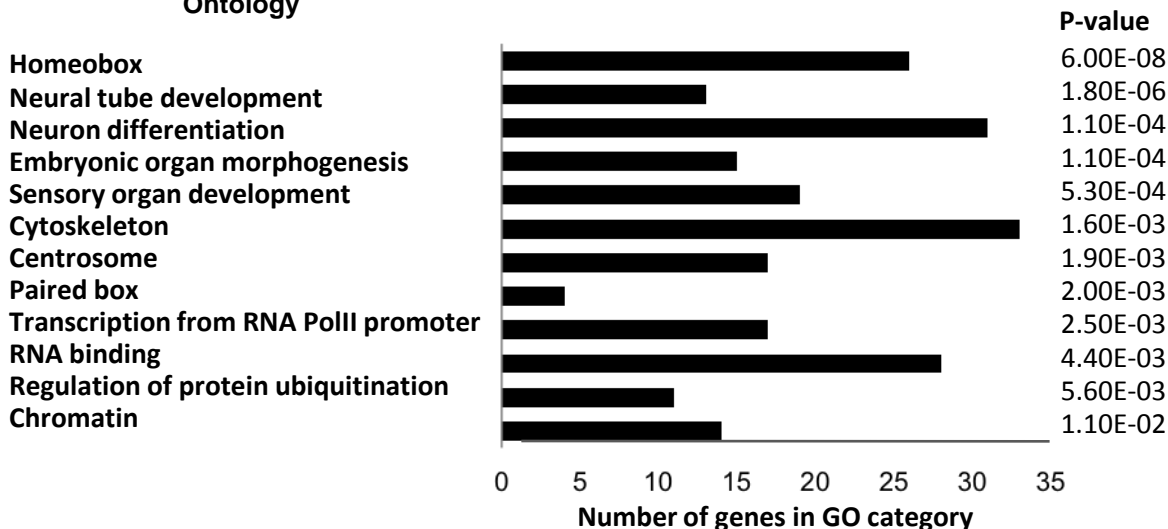

B

### Miz-1 Bound Genes Relative to Histone Marks by Ontology

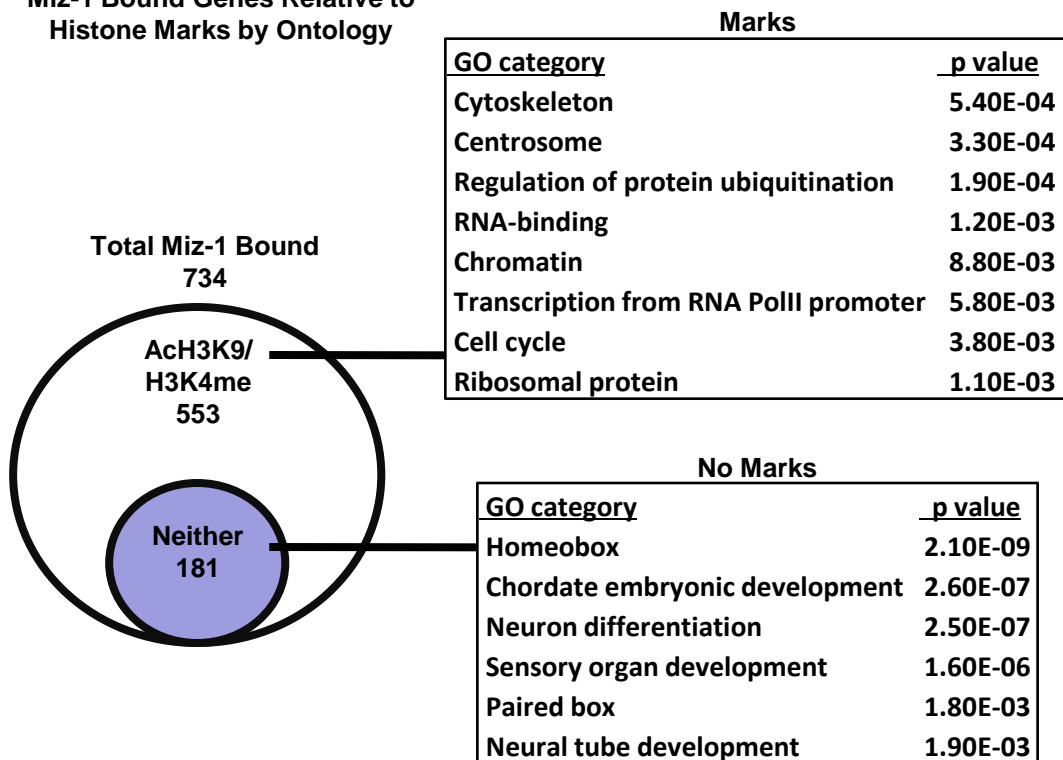

Supplement: 13072_2011_71_MOESM6_ESM.pdf [file 13072_2011_71_MOESM6_ESM.pdf]

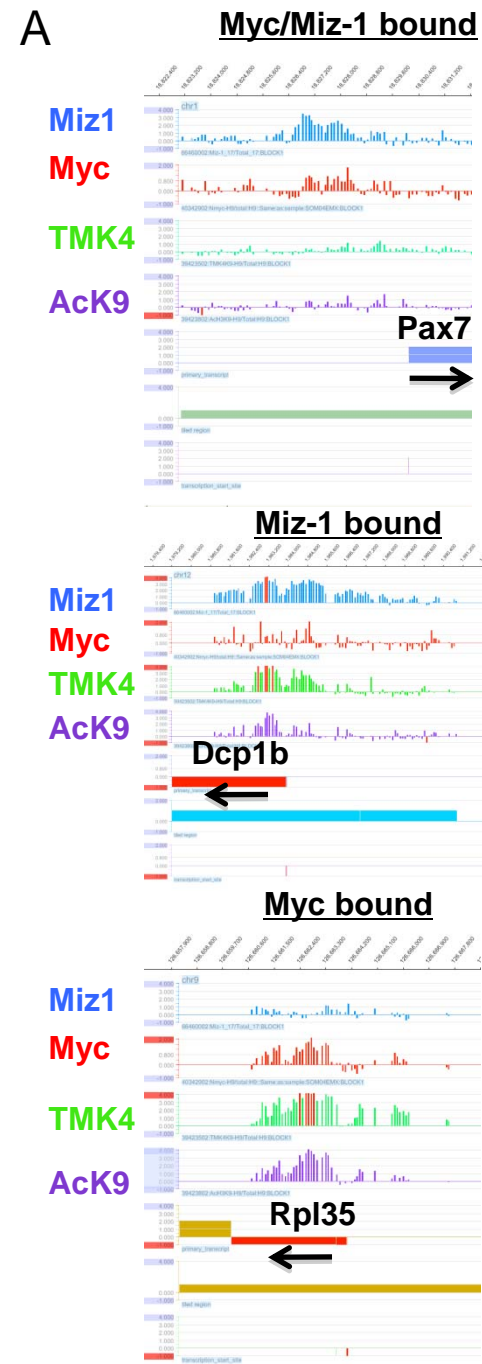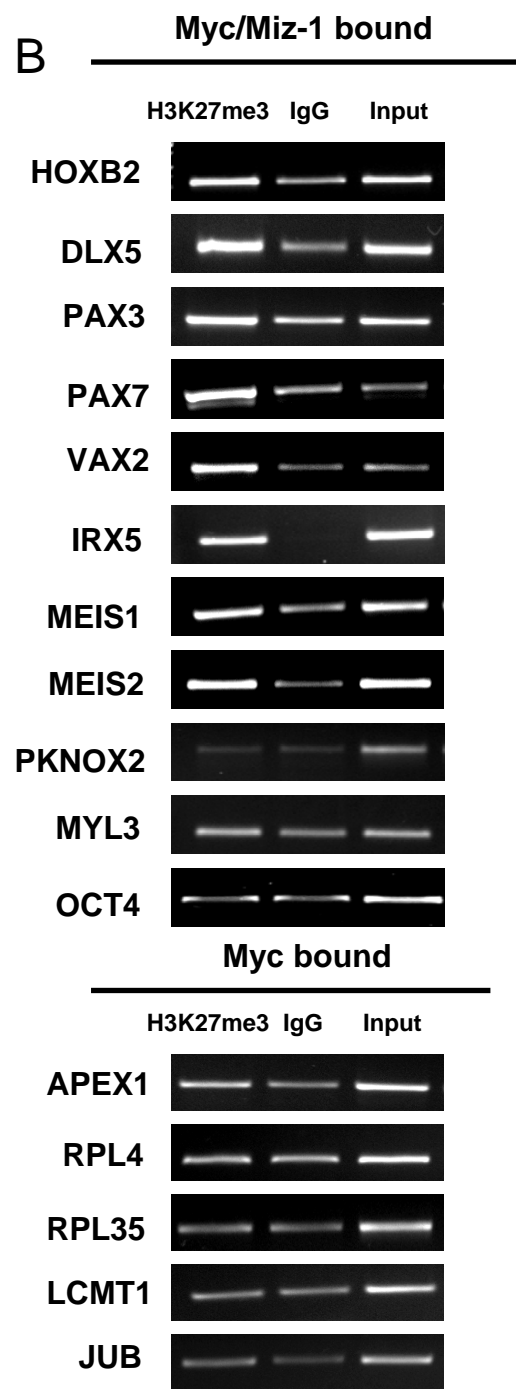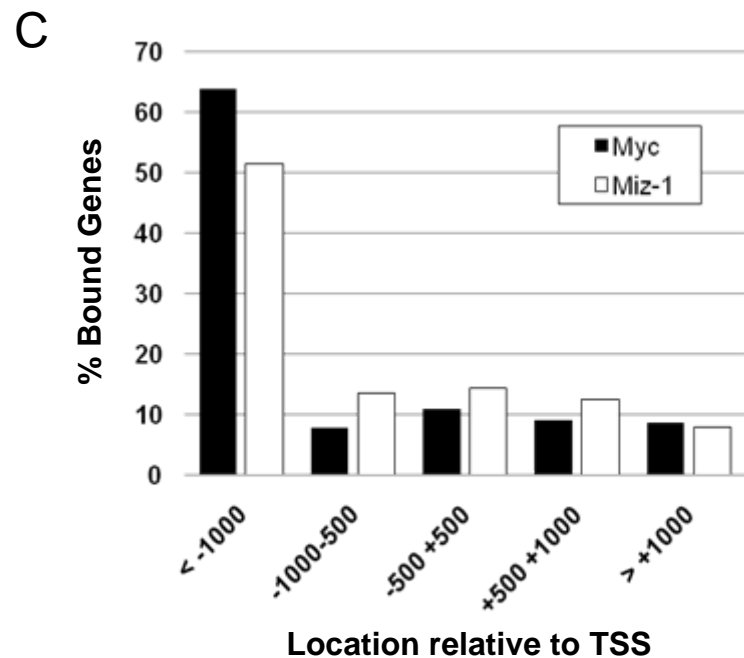

Supplement: 13072_2011_71_MOESM9_ESM.pdf [file 13072_2011_71_MOESM9_ESM.pdf]
